# Supplementary material for: Inorganic microcapsules mineralized at the interface of water droplets in ethanol solution and their application as drug carriers
Source: Royal Society of Chemistry journal article supplement (doi:10.1039/c5ra11861a), 2015-01-01
Supplement: c5ra11861a3.pdf [file c5ra11861a3.pdf]

# Inorganic microcapsules mineralized at the interface of water droplets in ethanol solution and their application as drug carriers

Yingchun Su, Wei Zong, Xiaole Zhao, Shenghua Ma, Xiaojun Han\*

*State Key Laboratory of Urban Water Resource and Environment, School of Chemical Engineering and Technology, Harbin Institute of Technology. 92West Da-Zhi Street, Harbin, 150001, China.*

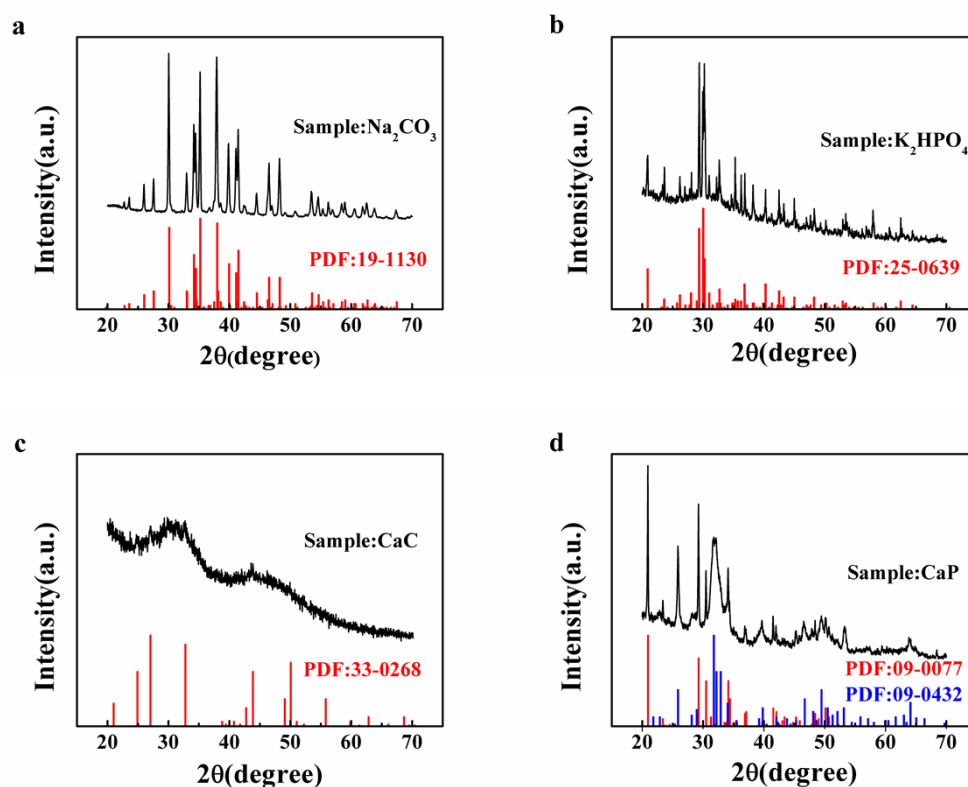

Fig. S1 The XRD patterns of  $\text{Na}_2\text{CO}_3$ ,  $\text{K}_2\text{HPO}_4$ , CaC and CaP samples (a,  $\text{Na}_2\text{CO}_3$ ; b,  $\text{K}_2\text{HPO}_4$ ; c, CaC; d, CaP).

The fluorescence spectrum of CF with the excitation wavelength of 450 nm presents maximum emission at 515 nm. The calibration curve of

maximum emission intensity against concentration of fluorescein with different pH is shown in Figure S2. And the maximum emission intensity increases linearly with the increase of concentration in the same pH value. According to Figure S2, we can calculate the releasing percentage at a certain time.

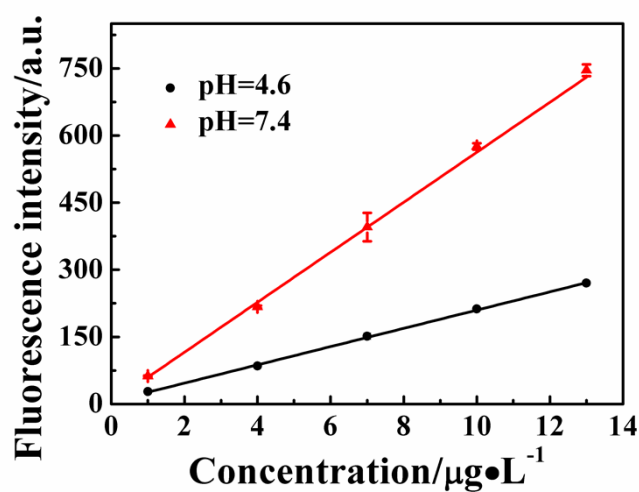

Fig. S2 The calibration curve of maximum emission intensity against concentration of CF with different pH.
